# Supplementary material for: The preparation of a flexible AuNP modified carbon cloth electrode and its application in electrochemical detection of Hg(ii) by continuous flow in environmental water
Source: Royal Society of Chemistry journal article supplement (doi:10.1039/c8an01284a), 2018-01-01
Supplement: c8an01284a1.pdf [file c8an01284a1.pdf]

## Supporting Information

### **The preparation of flexible AuNPs modified carbon cloth electrode and its application on electrochemical detection of Hg (II) by continuous flow way in environmental water**

Peng Guan,<sup>a,b</sup> Peng-Ran Guo,<sup>a</sup> Ning Liu,<sup>a</sup> Fang Zhang<sup>a</sup> and Yong-Qian Lei, <sup>\*a</sup>

Dr. Yongqian Lei,

E-mail: [yqlei@fenxi.com.cn](mailto:yqlei@fenxi.com.cn).

<sup>a</sup>Guangdong Provincial Key laboratory of Emergency Test for Dangerous Chemicals, Guangdong Engineering Technology Research Center of On-line Monitoring of Water Environmental Pollution, Guangdong Institute of Analysis, Guangzhou, 510070, China. E-mail: [yqlei@fenxi.com.cn](mailto:yqlei@fenxi.com.cn)

<sup>b</sup>College of Petrochemical Technology, Lanzhou University of Technology, Lanzhou, 730050, China.

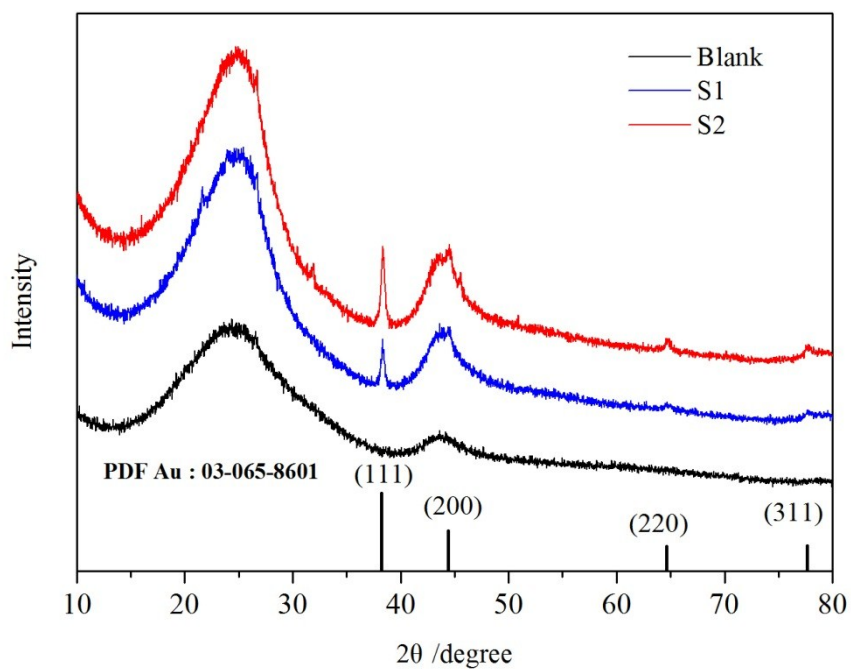

Figure S1. The XRD patterns of different sample:

(Blank). Raw carbon cloth sample;

(S1). Freshly prepared AuNPs carbon cloth sample;

(S2). The prepared electrode used for 30 times.

a

b

c

d

Figure S2. (a) The enlarged SEM image of AuNPs modified carbon cloth electrode and (b, c) the corresponding elements map of Au and C, (d) The EDX spectra of the AuNPs modified carbon cloth.

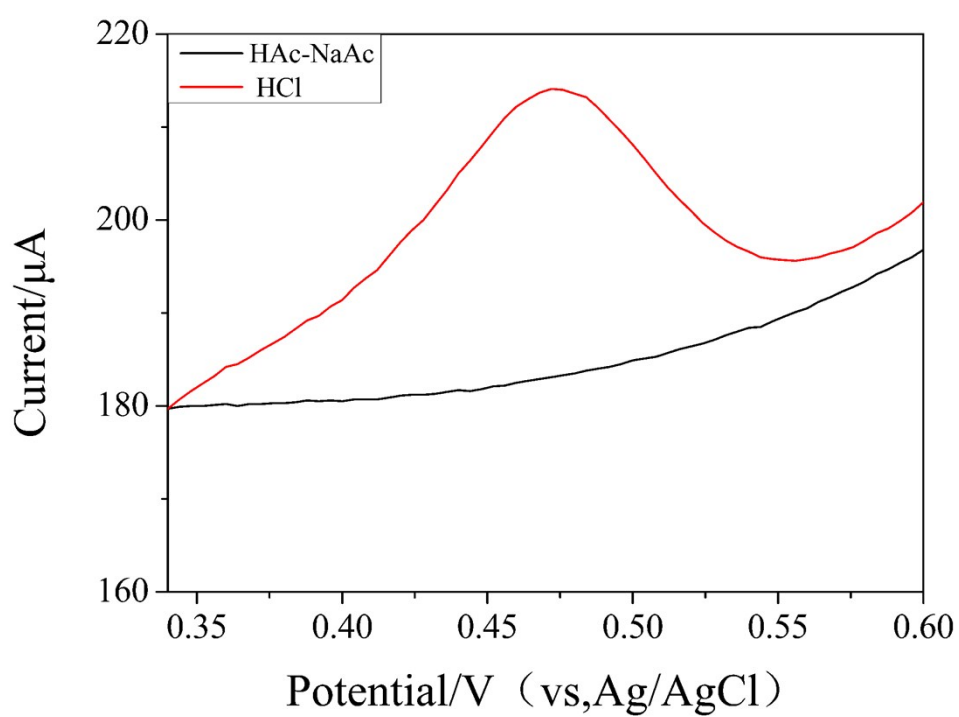

Figure S3. The curve of stripping response under different buffer solution (0.1 M HAc-NaAc and 0.2 M HCl) of 100 µg/L Hg<sup>2+</sup>

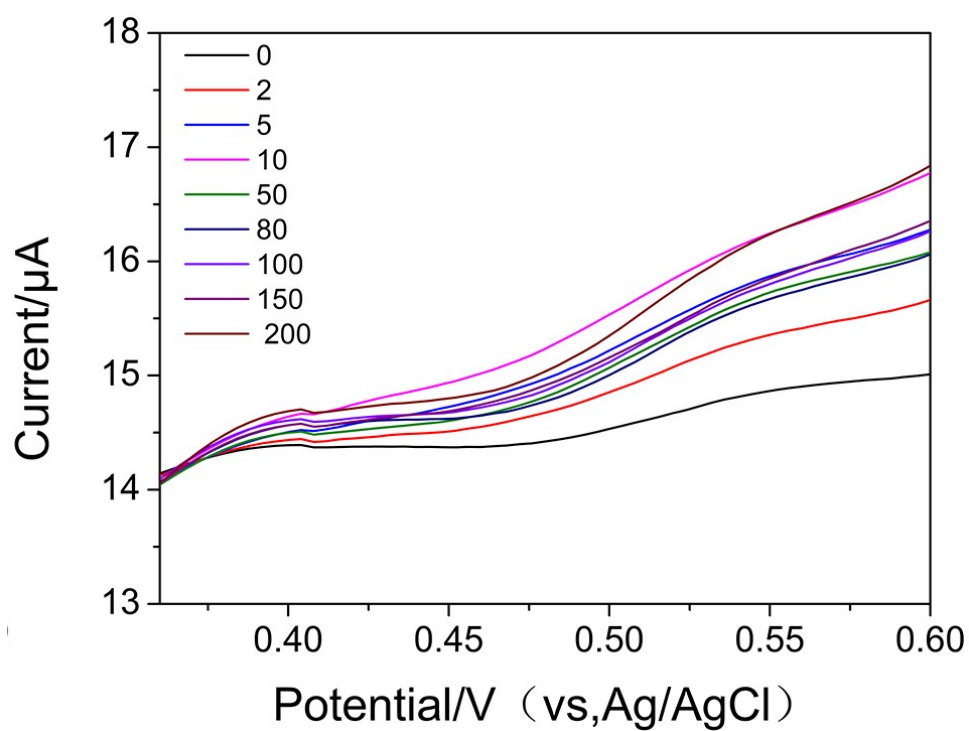

Figure S4. The stripping voltammetric curves of blank carbon cloth with different  $\text{Hg}^{2+}$  concentrations (bottom to top: 0, 2, 5, 10, 50, 80, 100, 150 and 200  $\mu\text{g/L}$ )

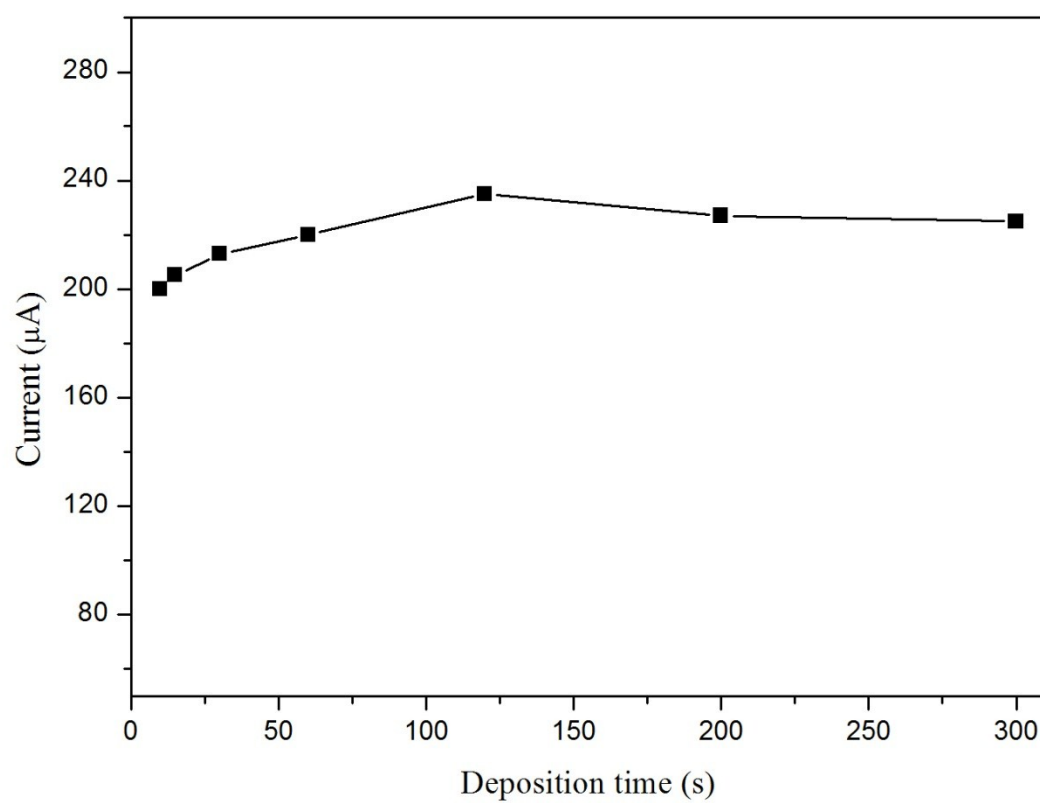

Figure S5. The stripping current peaks changes with the deposition time under the SWSV method.
